# Supplementary material for: Systematic Review of Potential Anticancerous Activities of Erythrina senegalensis DC (Fabaceae)
Source: MDPI journal article supplement (doi:10.3390/plants11010019), 2021-12-22
Supplement: s1 [file s1]

## A. Isoflavonoids

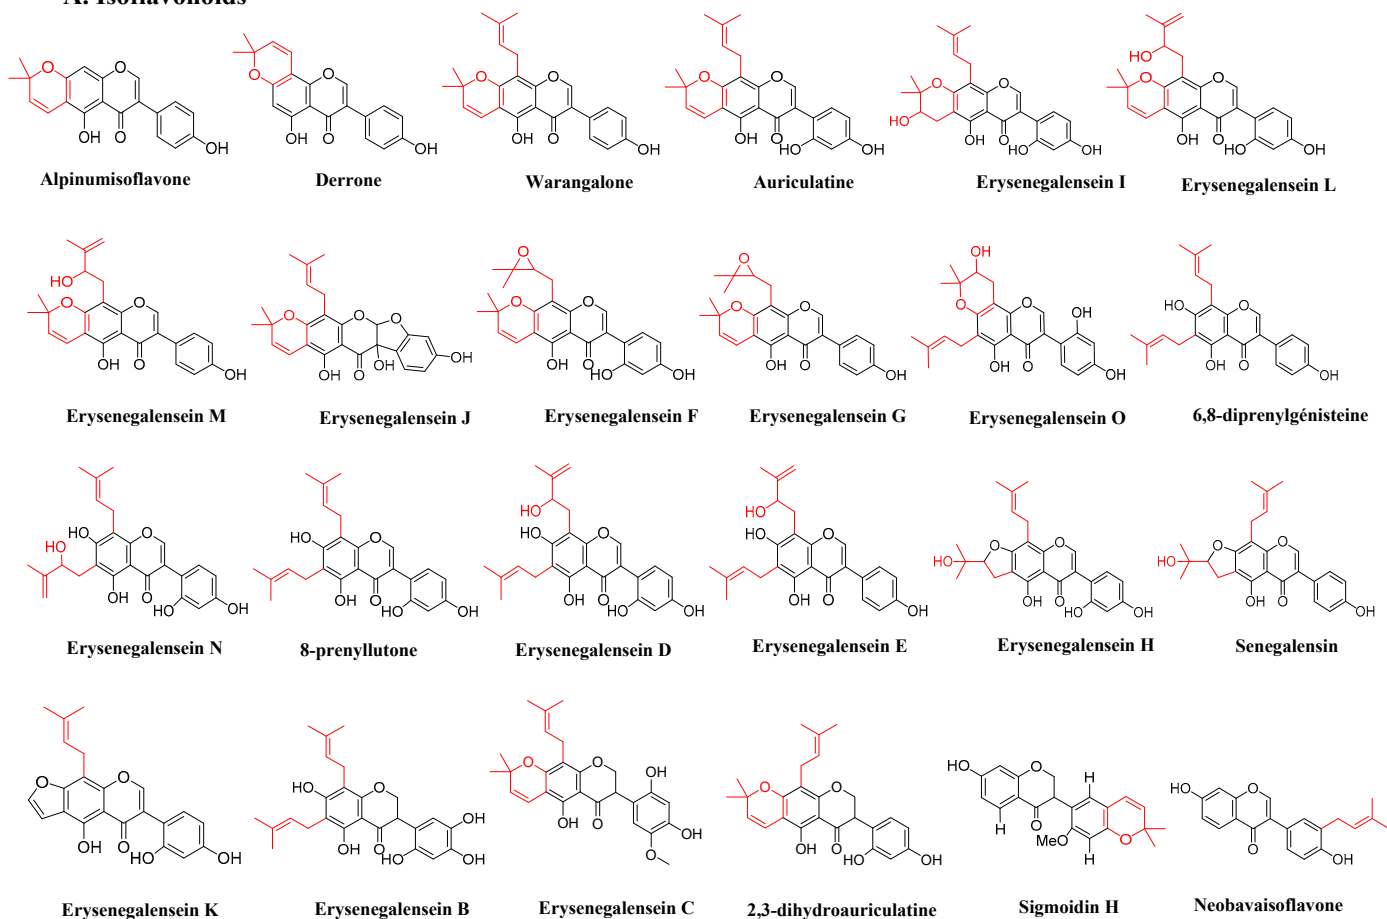

## B. Flavonoids

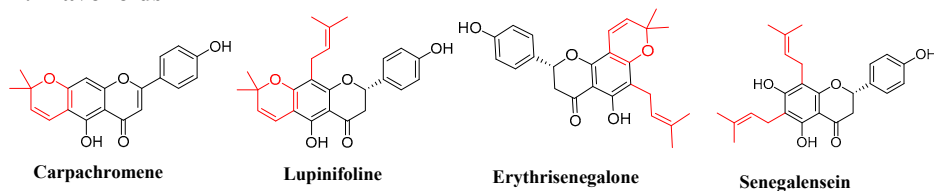

## C. Cinnamate

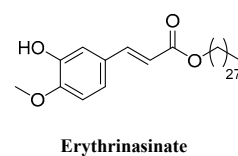

## D. Pterocarpan

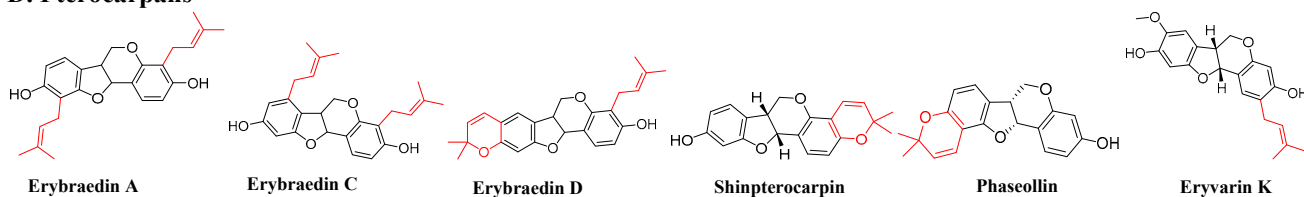

## E. Triterpens

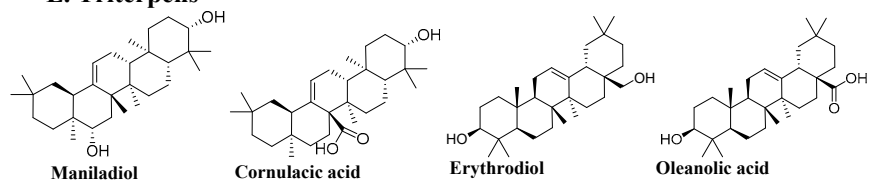

## F. Alkaloids

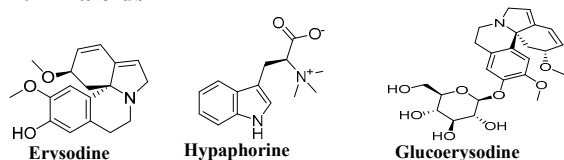

**Figure S1:** Chemical structures of all secondary metabolites isolated from *E. senegalensis* grouped into families. The patterns in red indicate the prenylation of the molecule.
